# Supplementary material for: Native proteins for triboelectric nanogenerators
Source: Royal Society of Chemistry journal article supplement (doi:10.1039/d4tc02923b), 2025-01-01
Supplement: d4tc02923b1.pdf [file d4tc02923b1.pdf]

**Supplementary Information (SI)**  
**for Journal of Materials**  
**Chemistry C.**

**This journal is © The Royal**  
**Society of Chemistry 2024**

**Table S1.** A comparative list of TENGs based on proteins, synthetic materials and other biomaterials in terms of design, area, main output characteristics and stability.

| Category          | Friction layer 1 |                   |                  | Conducting layer | encapsulated layer              | Area                   | TENG output performance |               |              |                 |                               | Stability (cycle period) | Reference |
|-------------------|------------------|-------------------|------------------|------------------|---------------------------------|------------------------|-------------------------|---------------|--------------|-----------------|-------------------------------|--------------------------|-----------|
|                   | Materials        | Surface treatment | Friction layer 2 |                  |                                 |                        | $V_{oc}$                | $I_{sc}$      | Output power | Transfer charge | Power density                 |                          |           |
| Protein materials | SF               | coating           | Mg               | Mg               | (50- $\mu$ m-thick) silk pocket | 2 cm $\times$ 4 cm     | 1060 V                  | 101 $\mu$ A   | -            | -               | 38.5 mW/m <sup>2</sup>        | -                        | 19        |
|                   | skin             | -                 | RG               | PC yarns         | PVA                             | 1 cm $\times$ 2 cm     | > 350 mV                | -             | -            | -               | -                             | >8000                    | 272       |
|                   | RSFF/PEO         | electrospinning   | PVDF-HFP         | Ag               | -                               | 4 cm $\times$ 4 cm     | 120 V                   | 0.33 $\mu$ A  | -            | -               | 40 $\mu$ W/cm <sup>2</sup>    | -                        | 163       |
|                   | RSFF/PEO         | electrospinning   | PDMS             | PANI/CA, Ag      | PET                             | 2 cm $\times$ 2 cm     | 225 V                   | 1.5 $\mu$ A   | -            | -               | 3.6 mW/cm <sup>2</sup>        | 1500                     | 234       |
|                   | PVA-SF           | casting           | PTFE             | Al, Au           | acrylic                         | 5 cm $\times$ 5 cm     | 280 V                   | 17.3 $\mu$ A  | -            | 32.5 nC         | 14.4 W/m <sup>2</sup>         | 10000                    | 236       |
|                   | CN-silk          | weaving           | F-cotton         | Cu               | -                               | 3 inch $\times$ 3 inch | 216.8 V                 | 50.3 $\mu$ A  | -            | -               | 0.345 mW/cm <sup>2</sup>      | 1000                     | 238       |
|                   | RSFF             | casting           | PDMS             | graphite         | -                               | 6 cm $\times$ 6 cm     | 666 V                   | 174.6 $\mu$ A | -            | -               | 412 $\mu$ W/cm <sup>2</sup>   | -                        | 140       |
|                   | RSFF             | electrospinning   | PVA/MXene        | Al               | -                               | diameter: 6 cm         | 118.4 V                 | -             | -            | -               | 1087.6 mW/m <sup>2</sup>      | 124000                   | 173       |
|                   | SF               | casting           | PTFE             | Al               | acrylic                         | 2 cm $\times$ 2 cm     | 395 V                   | -             | -            | -               | 22.05 W/m <sup>2</sup>        | 10000                    | 202       |
|                   | SF               | casting           | PET              | ITO              | -                               | 2 cm $\times$ 4 cm     | 268 V                   | 5.78 $\mu$ A  | 1.55 mW      | 92 nC           | 193.6 $\mu$ W/cm <sup>2</sup> | 18000                    | 28        |

|                 |                                  |                           |                                    |                      |                             |         |         |            |        |                             |        |     |
|-----------------|----------------------------------|---------------------------|------------------------------------|----------------------|-----------------------------|---------|---------|------------|--------|-----------------------------|--------|-----|
| RSFF            | electrospinning,<br>electrospray | PET                       | ITO                                | -                    | 1.5 cm × 3<br>cm            | 276 V   | 9.2 μA  | -          | -      | 317.4<br>μW/cm <sup>2</sup> | 75600  | 137 |
| RSSP/GR/<br>CNT | spin-coating                     | PET                       | ITO                                | PET                  | 6 cm × 8 cm                 | 2600 V  | 480 μA  | -          | -      | 52290<br>mW/m <sup>2</sup>  | 36000  | 57  |
| CK              | freeze-drying                    | PTFE                      | Cu                                 | PLA                  | 2.5 cm × 2.5<br>cm          | 324 V   | 32.2 μA | -          | -      | 14.4 W/m <sup>2</sup>       | 8000   | 71  |
| feather         | plasma<br>treatment              | PTFE                      | Al                                 | acrylic<br>substrate | 4 cm × 3.5<br>cm            | 247 V   | 27 μA   | 2.72<br>mW | -      | 1.943 W/m <sup>2</sup>      | -      | 67  |
| feather         | reactive ion<br>etching          | PTFE                      | Al                                 | acrylic<br>substrate | 4 cm × 3.5<br>cm            | 449 V   | 63 μA   | -          | 152 nC | -                           | -      | 66  |
| rabbit<br>furs  | -                                | FEP                       | PCB                                | acrylic plate        | outer radius:<br>7 cm       | 1100 V  | 13 μA   | 6.89<br>mW | 240 nC | 3.275 W/m <sup>3</sup>      | 10000  | 80  |
| CNF/RF          | -                                | PI                        | ITO                                | PET                  | 1 cm × 2<br>cm              | 110.0 V | 11.3 μA | -          | -      | 3.4 W/m <sup>2</sup>        | -      | 75  |
| rabbit<br>furs  | -                                | PTFE                      | PCB                                | UV-curable<br>resin  | outer<br>diameter: 15<br>cm | -       | 74.0 μA | 6.2 mW     | -      | 1.75 W/m <sup>3</sup>       | 400000 | 76  |
| CA              | electrospinning                  | PVDF                      | carbon NF<br>film                  | -                    | 5 cm × 5 cm                 | 350 V   | 1.2 μA  | -          | -      | 82.7<br>mW/m <sup>2</sup>   | 10000  | 165 |
| CA NFs          | electrospinning                  | B-C-N<br>PVA/PVD<br>F NFs | sprial<br>electrode<br>copper mesh | CA-P-M NFs           | 1 cm × 1 cm                 | 26 V    | 0.19 μA | -          | -      | 79.4<br>mW/m <sup>2</sup>   | 10000  | 166 |
| fish<br>bladder | deposite                         | FEP                       | Cu                                 | -                    | 4 cm × 4 cm                 | 106 V   | 7.3 μA  | 0.39<br>mW | 41 nC  | 200 mW/m <sup>2</sup>       | 850    | 88  |

|                    |                      |           |                        |                                 |                    |         |          |         |       |                          |        |     |
|--------------------|----------------------|-----------|------------------------|---------------------------------|--------------------|---------|----------|---------|-------|--------------------------|--------|-----|
| human hair         | bar and spin-coating | Kapton    | ITO                    | glass                           | 2 cm × 3 cm        | 103 V   | 10.9 μA  | -       | -     | 60 mW/m <sup>2</sup>     | -      | 239 |
| skin               | -                    | Ecoflex   | GelMA/MoS <sub>2</sub> | -                               | 3 cm × 3 cm        | 48.80 V | 0.57 μA  | -       | -     | -                        | 1000   | 216 |
| Rohu fish scale    | -                    | PTFE      | Cu, Al                 | plastic/cardboard support sheet | 3 cm × 4 cm        | 180 V   | 1.7 μA   | -       | -     | -                        | -      | 86  |
| FG                 | -                    | PTFE/PDMS | Cu                     | print paper                     | 5 cm × 5 cm        | 130 V   | 0.35 μA  | -       | -     | 45.8 μW/cm <sup>2</sup>  | 10 000 | 120 |
| Cu                 | -                    | PDMS      | FG-Ag hydrogel         | -                               | 5 cm × 5 cm        | 232 V   | 1.6 μA   | -       | -     | 0.9 mW/m <sup>2</sup>    | 5000   | 157 |
| gelatin            | spin-coating         | PI        | Cu                     | support plates                  | 5 cm × 5 cm        | 400 V   | —        | 6.16 mW | -     | -                        | 11 400 | 97  |
| ESM/SnO            | CBD                  | PTFE      | Al                     | -                               | 3 cm × 6 cm        | 15.8 V  | 0.146 μA | 1.18 mW | -     | -                        | 5400   | 102 |
| RG (pH-cycle) film | ultrasonic           | PDMS      | -                      | -                               | 4 cm <sup>2</sup>  | 170 V   | 14 μA    | -       | -     | 1800 mW/m <sup>2</sup>   | 30000  | 20  |
| SBG                | -                    | TS-PTFE   | Al, Cu                 | PET                             | 4.5 cm × 7 cm      | 84 V    | 28 μA    | -       | -     | 15.36 μW/cm <sup>2</sup> | 5000   | 268 |
| egg white/HPMC     | -                    | PTFE      | Al                     | cardboard                       | -                  | 120 V   | 12 μA    | 6.65 μW | 50 nC | -                        | 30000  | 25  |
| snake ecdysis      | RF sputtering        | PTFE      | Ag, Cu                 | PET                             | 20 cm <sup>2</sup> | 120 V   | 160 μA   | 6250 μW | -     | -                        | 78000  | 117 |
| chicken skin       | -                    | Kapton    | Al                     | PET                             | 3 cm × 3 cm        | 123 V   | 20 μA    | 1.8 mW  | -     | 0.2 mW/cm <sup>2</sup>   | 52000  | 89  |

|                    |                      |                                    |         |                  |                       |                       |         |          |          |                       |                           |       |     |
|--------------------|----------------------|------------------------------------|---------|------------------|-----------------------|-----------------------|---------|----------|----------|-----------------------|---------------------------|-------|-----|
| Other biomaterials | egg white            | spin-coating                       | Kapton  | Al               | -                     | 4 cm × 4 cm           | 1720 V  | 16.05 mA | 105.26 W | -                     | 328.84 mW/cm <sup>2</sup> | -     | 112 |
|                    | lignin               | freeze-drying                      | FEP     | carbon electrode | -                     | 3 cm × 1.2 cm         | 208 V   | 60 μA    | -        | 30 nC                 | 4.86 W/m <sup>2</sup>     | 10000 | 240 |
|                    | sodium alginate      | -                                  | PVA     | Al, Li           | soluble adhesive tape | 10-30 cm <sup>2</sup> | 1.47 V  | 3.9 μA   | -        | -                     | 3.8 mW/m <sup>2</sup>     | -     | 242 |
|                    | BNC                  | -                                  | Cu, POM | Cu               | PP, POM               | 5 cm × 5 cm           | 13 V    | 11 μA    | -        | -                     | 4.8 mW/m <sup>2</sup>     | -     | 241 |
|                    | TPS/glycerol         | -                                  | PDMS    | carbon tape      | PET                   | 4.3 cm × 3.5 cm       | 560 V   | 0.18 mA  | 1.265 mW | -                     | 17 W/m <sup>2</sup>       | 4350  | 243 |
|                    | chitosan-glycerol    | coating                            | PTFE    | Cu               | acrylic plate         | 5 cm × 3 cm           | 130 V   | 15 μA    | -        | -                     | 2.7 W/m <sup>2</sup>      | 10000 | 248 |
|                    | chitosan/acetic acid | -                                  | Kapton  | Cu               | -                     | 2 cm × 2 cm           | 1.2 V   | 60 μA    | -        | -                     | 17.5 μW/m <sup>2</sup>    | -     | 244 |
|                    | cellulose            | spray-coating                      | PTFE    | ITO              | PET                   | 2 cm × 2 cm           | 300 V   | 0.30 μA  | -        | -                     | 15 W/m <sup>2</sup>       | 10800 | 245 |
|                    | BC/AgNWs/BTO         | ultrasonication, vacuum filtration | PVDF    | Cu               | PI                    | 2 cm × 2 cm           | 85 V    | 7.1 μA   | -        | 35 nC                 | 75 μW/cm <sup>2</sup>     | 3000  | 246 |
|                    | ACA                  | freeze-drying                      | PTFE    | wire coils       | -                     | 2 cm × 2 cm           | 104 V   | 1.52 μA  | -        | -                     | 694 mW/m <sup>2</sup>     | -     | 257 |
| paper              | -                    | PTFE                               | Cu      | -                | 2 cm × 2 cm           | 400 V                 | 0.17 mA | -        | 26 nC    | 53 W/m <sup>2</sup>   | 200000                    | 247   |     |
| CCP                | -                    | NCM                                | Cu      | print paper      | 2.5 cm × 2.5 cm       | 196.8 V               | 31.5 μA | -        | -        | 16.1 W/m <sup>2</sup> | 10000                     | 249   |     |

|                     |                                            |                 |                 |                        |                       |                  |         |              |          |        |                          |       |     |
|---------------------|--------------------------------------------|-----------------|-----------------|------------------------|-----------------------|------------------|---------|--------------|----------|--------|--------------------------|-------|-----|
|                     | PLA/mPEG NFF                               | electrospinning | P(VDF-TrFE) NFF | Al                     | print paper           | 1 cm × 2 cm      | 342.8 V | 38.5 $\mu$ A | 23.24 mW | -      | 116.21 W/m <sup>2</sup>  | 10000 | 255 |
|                     | NNF                                        | electrospinning | FEP             | Cu                     | acrylic plate, Kapton | 3 cm × 3 cm      | 494 V   | 30 $\mu$ A   | -        | 189 nC | 9.52 W/m <sup>2</sup>    | 5000  | 254 |
| Synthetic materials | SCL@(g-C <sub>3</sub> N <sub>4</sub> /PVA) | coating         | PI              | MXene@carbon electrode | Ecoflex               | 5 cm × 10 cm     | 720 V   | 134 $\mu$ A  | -        | -      | 0.255 mW/cm <sup>2</sup> | 16000 | 256 |
|                     | PI/MoS <sub>2</sub>                        | spray-coating   | PI              | Al                     | PET, glass            | 1.5cm × 2.5cm    | 400 V   | -            | -        | -      | 25.7 W/m <sup>2</sup>    | -     | 252 |
|                     | skin                                       | -               | nickel-PDMS     | GR                     | PU                    | 1 cm × 3 cm      | -       | -            | -        | -      | 782.8 mW/m <sup>2</sup>  | 500   | 251 |
|                     | PVDF-TrFE/MXene                            | electrospinning | Nylon-11        | conductive fabrics     | acrylic sheet         | diameter: 1.5 cm | 270 V   | -            | -        | -      | 4.02 W/m <sup>2</sup>    | 20000 | 250 |

Note: Voc = Open circuit voltage, Isc = Short circuit current, poly(ethylene oxide) (PEO), poly(vinylidene fluoride-co-hexafluoropropylene) (PVDF-HFP), Hydroxypropyl methyl cellulose (HPMC), polyvinyl chloride (PVC), printed circuit board (PCB), fluorinated ethylene propylene (FEP), collagen aggregate (CA), concanavalin A (ConA), collagen aggregate nanofibers (CA NFs), bead-chain-net poly(vinyl alcohol)/poly(vinylidene fluoride) nanofibers (B-C-N PVA/PVDF NFs), CA and acidified MWNTs NFs (CA-M NFs), gelatin-methacryloyl (GelMA), cellulose nanofibril/rabbit fur (CNF/RF), polyimide (PI), indium tin oxide (ITO), polyethylene terephthalate (PET), polyaniline/cellulose nanofibers (PANI/CA), chemical bath deposition (CBD), fish gelatin (FG), Acrylamide (AM), stearyl methacrylate (SMA), cellulose Nano Fiber (CNF), split black gram (SBG), thread sealant PTFE (TS-PTFE), glycerol-plasticized silk fibroin (RG), polyvinyl alcohol (PVA), polypyrrole cotton (PC), polyimide (PI), the extract of collagen (Col), oxidized hyaluronic acid (OHA), acrylic acid (AA), black wattle bark tannin (BWT), silver nanoparticles (AgNPs), ethylene glycol (EG), CN-silk (cyanoalkylated siloxane grafted silk), F-cotton (fluoroalkylated siloxane grafted cotton), regenerated silk fibroin fiber (RSFF), graphene (GR), bacterial nanocellulose (BNC), polyoxymethylene (POM), polypropylene (PP), thermoplastic starch (TPS), bacteria cellulose//BaTiO<sub>3</sub>(BC/AgNWs/BTO), crepe cellulose paper (CCP), nitrocellulose membrane (NCM), poly(lactic acid) nanofibrous membranes (PLA NFM), Nylon/Na<sub>2</sub>SO<sub>4</sub> nanofiber film (NNF), poly(vinylidene fluoride-co-trifluoroethylene) nanofibrous film (P(VDF-TrFE) NFF), PLA/poly(ethylene glycol) monomethyl ether nanofibrous film (PLA/mPEG NFF), Ecoflex/g-C<sub>3</sub>N<sub>4</sub> and Ecoflex/PVA based silicone composite layer (SCL@(g-C<sub>3</sub>N<sub>4</sub>/PVA)), aramid nanofiber (ANF)/CNF/silver nanowire (AgNW) (ACA), rice glutelin (pH-cycle) (RG (pH-cycle)), hydrogel by integrating fish gelatin into polymer networks with in-situ formation of silver nanoparticles (FG-Ag hydrogel), keratin/chitosan (CK).
